# Supplementary material
Source: PubMed Central journal article supplement (PMC5735839)

**Supplementary Material for  
“Src family kinase phosphorylation of the motor domain of the human kinesin-5, Eg5”**

**Figure S1**

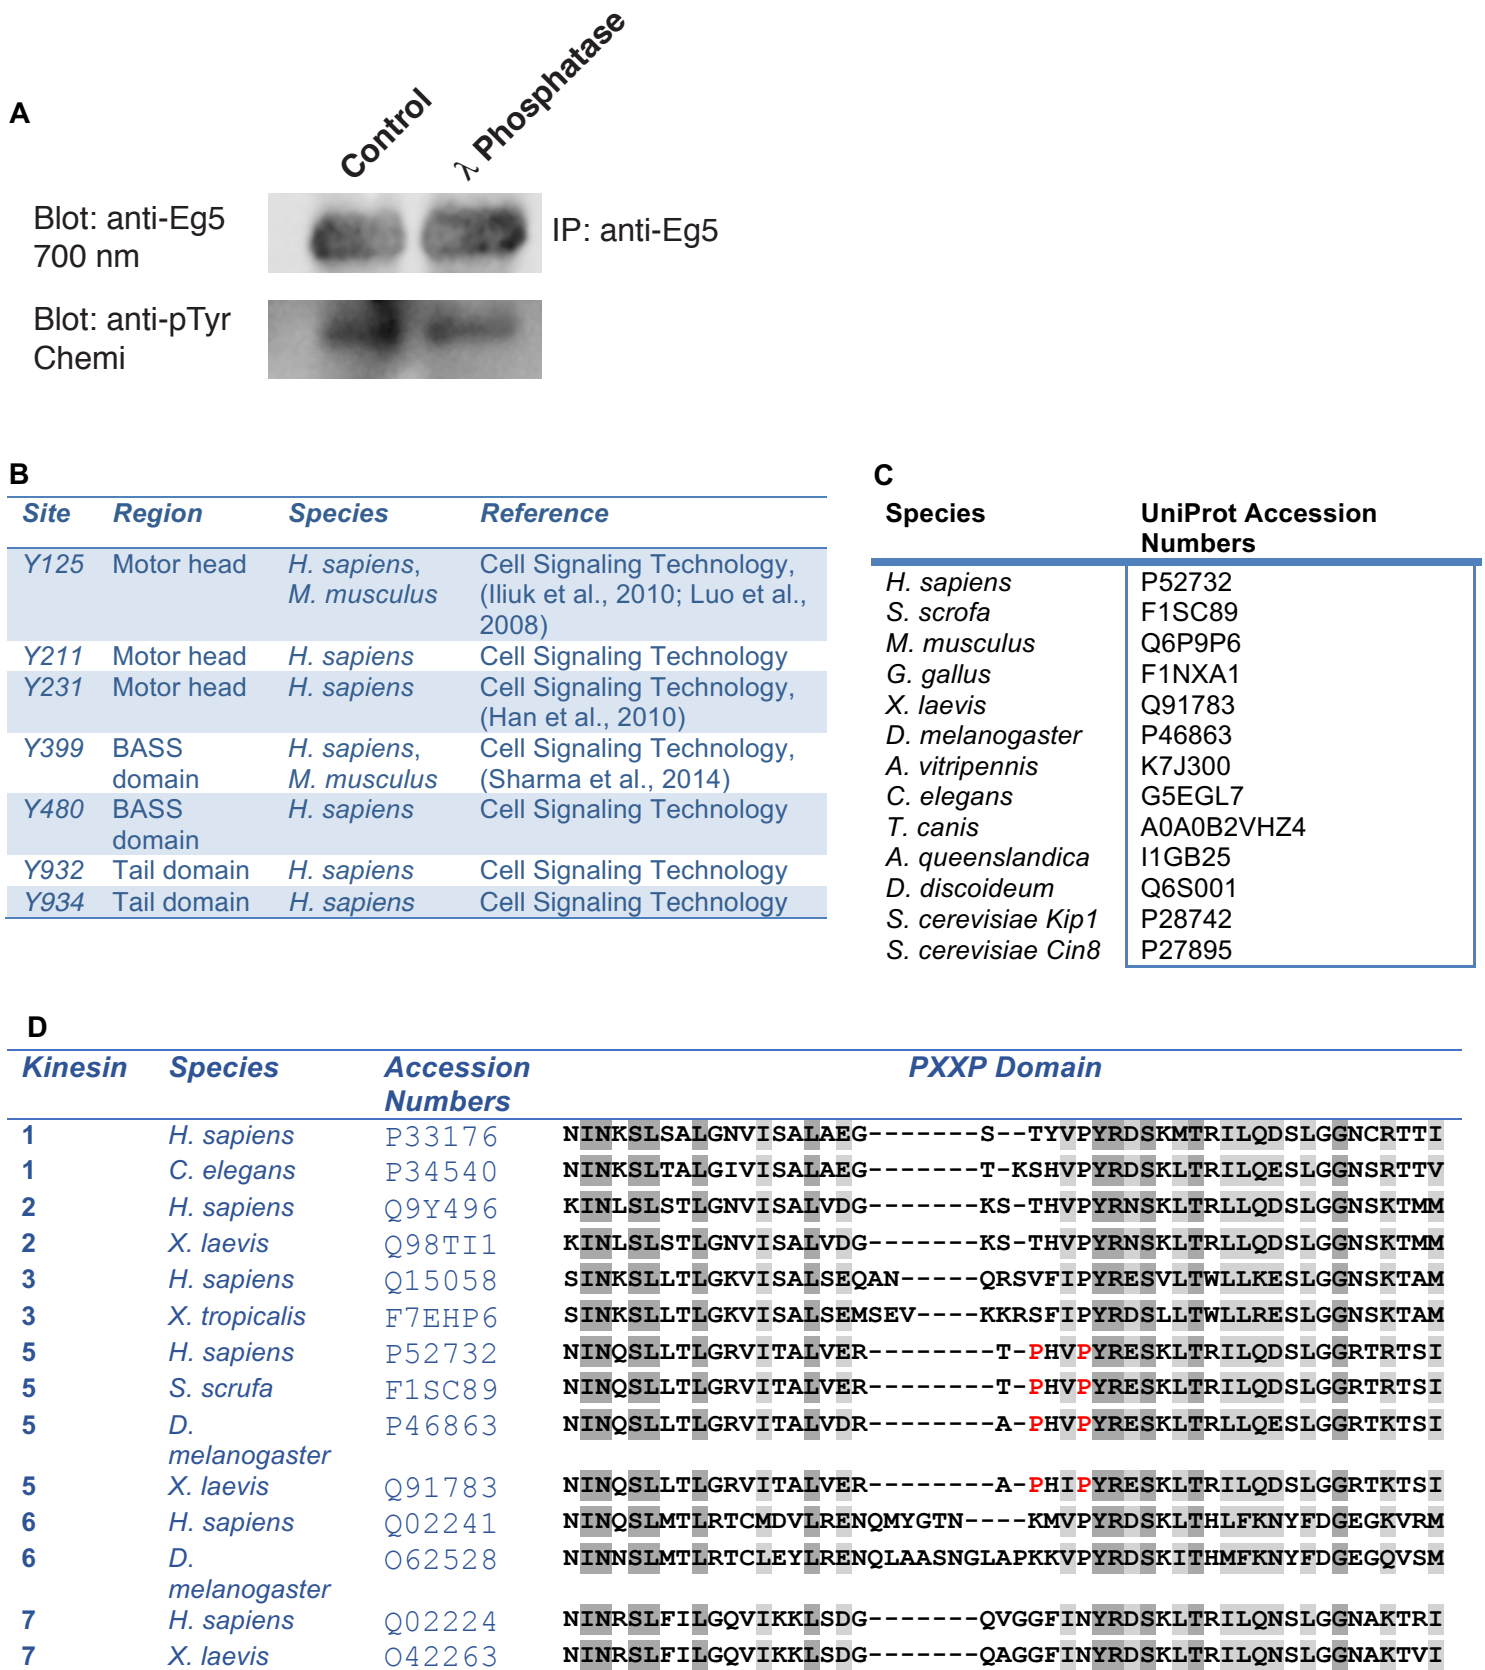

Figure S1

E

| CONSTRUCT                     | Expression Vector | Tag           | Residues | Y125                      | Y211                       | Y231                      | PXXP                        |
|-------------------------------|-------------------|---------------|----------|---------------------------|----------------------------|---------------------------|-----------------------------|
| <b>EG5-367 E270A</b>          | pRSET             | C-term 6X His | 1-367    | SPNEEYTWEEEDPLAG          | TVHNKDEVYQIILEKGA          | TAATLMNAYSSRSRSH          | TALVERTPHVVPYRESKL          |
| <b>EG5-367 GSTY E270A</b>     | pRSET             | C-term 6X His | 1-367    | SPNEEYTWEEEDPLAG          | TVHNKDEVYQIILEKGA          | TAATLMNAYSSRSRSH          | TALVE <b>GSTY</b> VVPYRESKL |
| <b>EG5-367-3Y-&gt;F E270A</b> | pRSET             | C-term 6X His | 1-367    | SPNEE <b>F</b> TWEEEDPLAG | TVHNKDEV <b>F</b> QIILEKGA | TAATLMNA <b>F</b> SSRSRSH | TALVERTPHVVPYRESKL          |
| <b>EG5-367-2Y-&gt;F E270A</b> | pRSET             | C-term 6X His | 1-367    | SPNEEYTWEEEDPLAG          | TVHNKDEV <b>F</b> QIILEKGA | TAATLMNA <b>F</b> SSRSRSH | TALVERTPHVVPYRESKL          |
| <b>Eg5-367myc</b>             | pcDNA3            | C-term Myc    | 1-367    | SPNEEYTWEEEDPLAG          | TVHNKDEVYQIILEKGA          | TAATLMNAYSSRSRSH          | TALVERTPHVVPYRESKL          |
| <b>Eg5-367myc-GSTY</b>        | pcDNA3            | C-term Myc    | 1-367    | SPNEEYTWEEEDPLAG          | TVHNKDEVYQIILEKGA          | TAATLMNAYSSRSRSH          | TALVE <b>GSTY</b> VVPYRESKL |
| <b>Eg5-367myc-3Y-&gt;F</b>    | pcDNA3            | C-term Myc    | 1-367    | SPNEE <b>F</b> TWEEEDPLAG | TVHNKDEV <b>F</b> QIILEKGA | TAATLMNA <b>F</b> SSRSRSH | TALVERTPHVVPYRESKL          |
| <b>Eg5-367</b>                | pRSET             | C-term 6X His | 1-367    | SPNEEYTWEEEDPLAG          | TVHNKDEVYQIILEKGA          | TAATLMNAYSSRSRSH          | TALVERTPHVVPYRESKL          |
| <b>Eg5-367 DL5</b>            | pRSET             | C-term 6X His | 1-367    | SPNEE- - - - -LAG         | TVHNKDEVYQIILEKGA          | TAATLMNAYSSRSRSH          | TALVERTPHVVPYRESKL          |
| <b>Eg5-367 GSTY</b>           | pRSET             | C-term 6X His | 1-367    | SPNEEYTWEEEDPLAG          | TVHNKDEVYQIILEKGA          | TAATLMNAYSSRSRSH          | TALVE <b>GSTY</b> VVPYRESKL |
| <b>EG5-367-Y125E</b>          | pRSET             | C-term 6X His | 1-367    | SPNEE <b>E</b> TWEEEDPLAG | TVHNKDEVYQIILEKGA          | TAATLMNAYSSRSRSH          | TALVERTPHVVPYRESKL          |
| <b>EG5-367-Y211E</b>          | pRSET             | C-term 6X His | 1-367    | SPNEEYTWEEEDPLAG          | TVHNKDEV <b>E</b> QIILEKGA | TAATLMNAYSSRSRSH          | TALVERTPHVVPYRESKL          |
| <b>EG5-367-Y231E</b>          | pRSET             | C-term 6X His | 1-367    | SPNEEYTWEEEDPLAG          | TVHNKDEVYQIILEKGA          | TAATLMNA <b>E</b> SSRSRSH | TALVERTPHVVPYRESKL          |
| <b>EG5-367-Y125F</b>          | pRSET             | C-term 6X His | 1-367    | SPNEE <b>F</b> TWEEEDPLAG | TVHNKDEVYQIILEKGA          | TAATLMNAYSSRSRSH          | TALVERTPHVVPYRESKL          |
| <b>EG5-367-Y211F</b>          | pRSET             | C-term 6X His | 1-367    | SPNEEYTWEEEDPLAG          | TVHNKDEV <b>F</b> QIILEKGA | TAATLMNAYSSRSRSH          | TALVERTPHVVPYRESKL          |
| <b>EG5-367-Y231F</b>          | pRSET             | C-term 6X His | 1-367    | SPNEEYTWEEEDPLAG          | TVHNKDEVYQIILEKGA          | TAATLMNA <b>F</b> SSRSRSH | TALVERTPHVVPYRESKL          |
| <b>Eg5-WT-Em</b>              | Clontech          | Emerald Green | 1-1056   | SPNEEYTWEEEDPLAG          | TVHNKDEVYQIILEKGA          | TAATLMNAYSSRSRSH          | TALVERTPHVVPYRESKL          |
| <b>Eg5-GSTY-Em</b>            | Clontech          | Emerald Green | 1-1056   | SPNEEYTWEEEDPLAG          | TVHNKDEVYQIILEKGA          | TAATLMNAYSSRSRSH          | TALVE <b>GSTY</b> VVPYRESKL |
| <b>Eg5-Y211E-Em</b>           | Clontech          | Emerald Green | 1-1056   | SPNEEYTWEEEDPLAG          | TVHNKDEV <b>E</b> QIILEKGA | TAATLMNAYSSRSRSH          | TALVERTPHVVPYRESKL          |
| <b>Eg5-Y211F-Em</b>           | Clontech          | Emerald Green | 1-1056   | SPNEEYTWEEEDPLAG          | TVHNKDEV <b>F</b> QIILEKGA | TAATLMNAYSSRSRSH          | TALVERTPHVVPYRESKL          |
| <b>Eg5-Y125E-Em</b>           | Clontech          | Emerald Green | 1-1056   | SPNEE <b>E</b> TWEEEDPLAG | TVHNKDEVYQIILEKGA          | TAATLMNAYSSRSRSH          | TALVERTPHVVPYRESKL          |
| <b>Eg5-Y125F-Em</b>           | Clontech          | Emerald Green | 1-1056   | SPNEE <b>F</b> TWEEEDPLAG | TVHNKDEVYQIILEKGA          | TAATLMNAYSSRSRSH          | TALVERTPHVVPYRESKL          |
| <b>Eg5-Y125E,Y211E-Em</b>     | Clontech          | Emerald Green | 1-1056   | SPNEE <b>E</b> TWEEEDPLAG | TVHNKDEV <b>E</b> QIILEKGA | TAATLMNAYSSRSRSH          | TALVERTPHVVPYRESKL          |

F

| Name                | Vector       | Tag               | Mutations    | Use                                                 |
|---------------------|--------------|-------------------|--------------|-----------------------------------------------------|
| <i>Klp61F E266A</i> | pRSET        | C-term 6X His tag | E266A        | Bacterial expression, <i>in vitro</i> kinase assays |
| <i>c-Src Active</i> | pCMV-SPORT 6 | (none)            | Y527F        | Mammalian expression, transfection experiments      |
| <i>c-Src IR</i>     | pCMV-SPORT 6 | (none)            | T338M, Y527F | Mammalian expression, transfection experiments      |

Figure S2

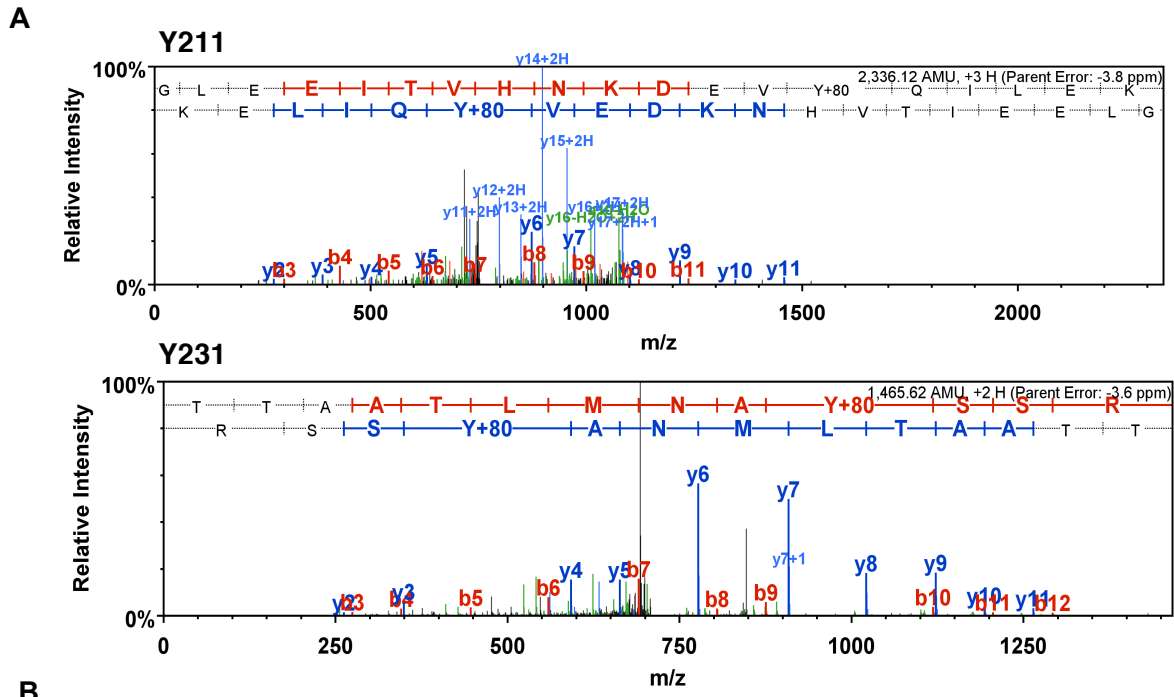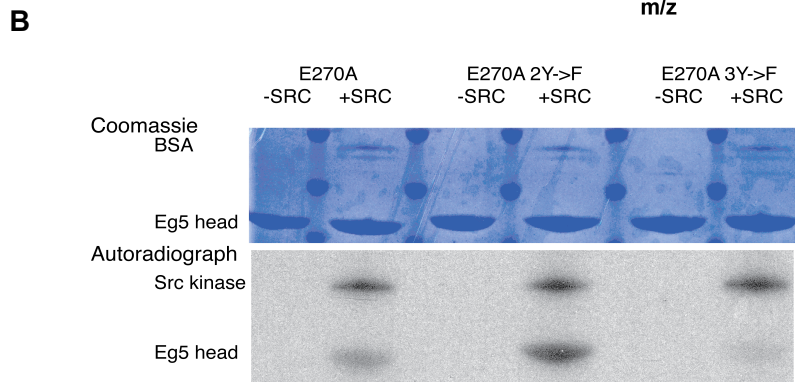

**Figure S3**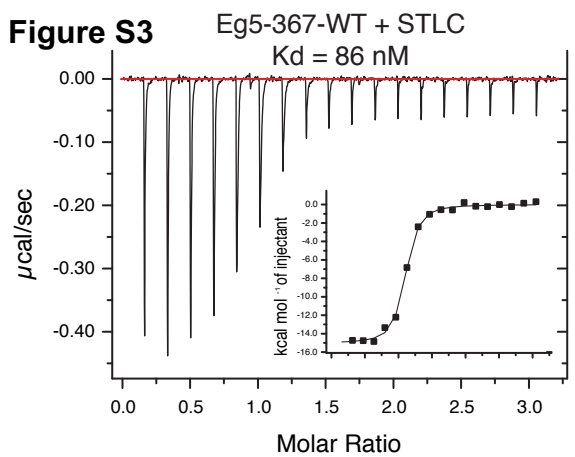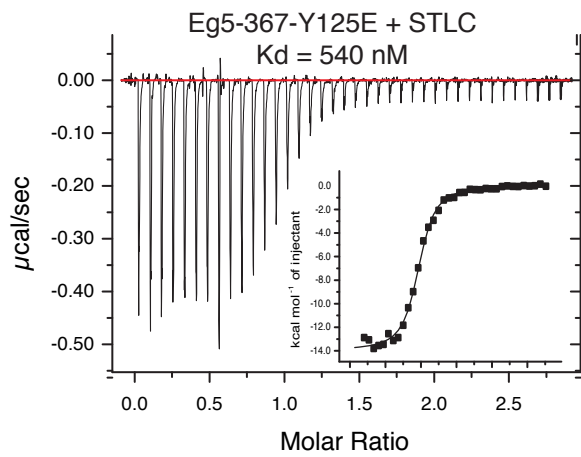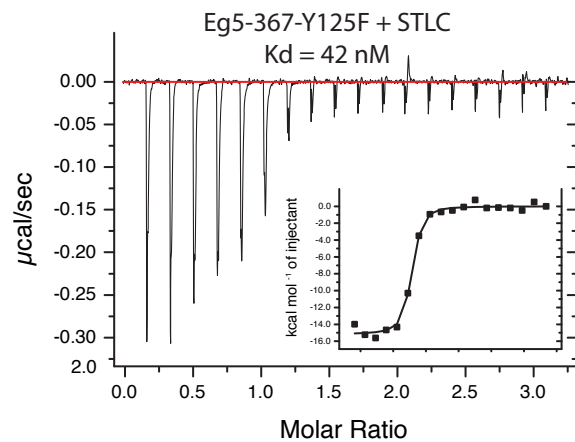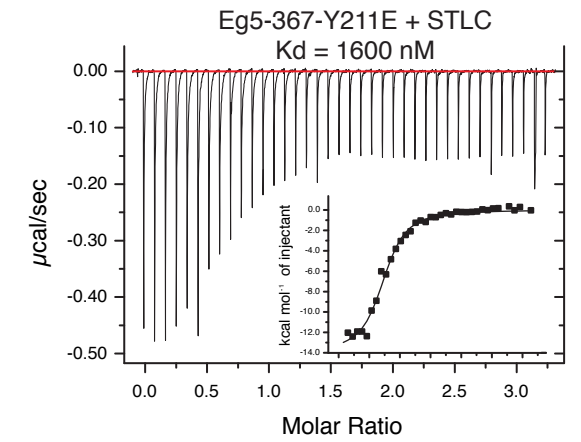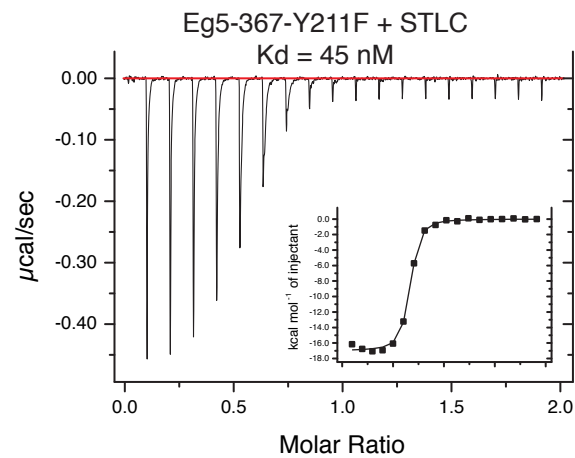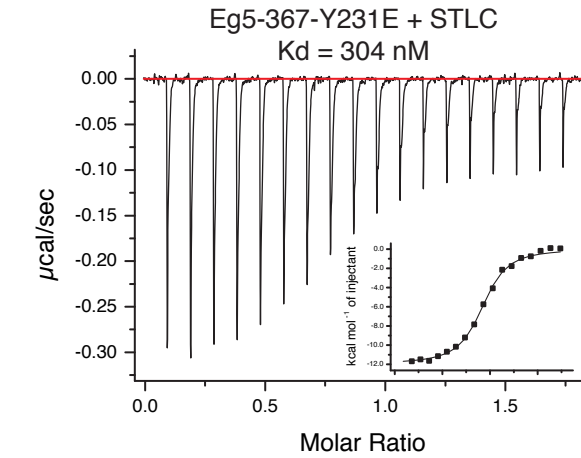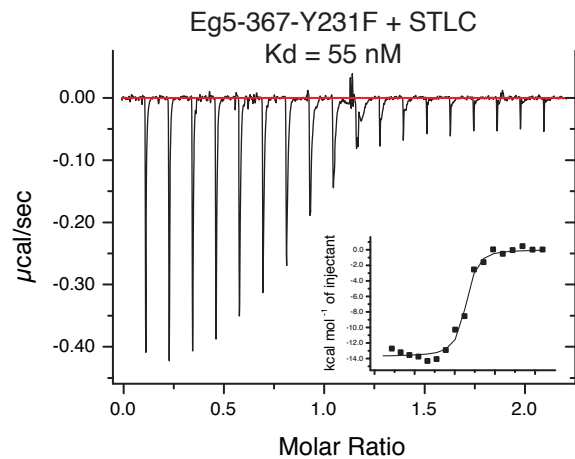

| Protein | N    | K <sub>D</sub><br>(kcal mol <sup>-1</sup> ) | H<br>(kcal mol <sup>-1</sup> ) | TΔS<br>(kcal mol <sup>-1</sup> ) |
|---------|------|---------------------------------------------|--------------------------------|----------------------------------|
| WT      | 1.07 | 86±21                                       | -15.1±3.0                      | -5.6                             |
| Y125F   | 1.03 | 42±18                                       | -13.4±4.3                      | -4.9                             |
| Y125E   | 0.95 | 540±150                                     | -16.3±4.5                      | -6.4                             |
| Y211F   | 0.62 | 45±6.0                                      | -14.0±4.2                      | -6.1                             |
| Y211E   | 0.74 | 1600±250                                    | -17.0±1.3                      | -7.1                             |
| Y231F   | 1.09 | 55±19                                       | -12.0±1.4                      | -3.2                             |
| Y231E   | 0.89 | 304±32                                      | -13.7±2.9                      | -3.9                             |

**Figure S4**

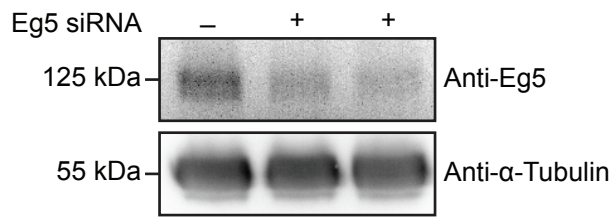

Supplement: NIHMS926468-supplement-Supplementary_Information.pdf [file NIHMS926468-supplement-Supplementary_Information.pdf]
